# Supplementary material
Source: publisher site journal article supplement (https://www.spandidos-publications.com/4001/downloadSupplementary)
Supplement: Supplementary file 1 [file downloadSupplementary]

## Sheet: Sheet1
Table SVI. Gene Ontology term analysis of differentially expressed genes in acute myocardial infarction.
goID	goClass	goTerm	-log10(pValue)	pValue	FDR	backgroundGeneNo	inputGeneList
GO:0016021	cellular_component	integral component of membrane (28, 1.87)	3.72	0.000188522	0.0343625	5768	KLRB1,AQP9,TACSTD2,FCAR,KLRC1,ENPP5,HLA-DQA1,PTGDR,P2RY12,MGAM,CR1,KLRC2,ACSL1,KLRC4,TMEM176B,KCNJ15,KREMEN1,MCEMP1,NRG1,TGFBR3,VNN1,B3GNT5,KLRF1,YME1L1,KLRD1,DSC2,TMEM45A
GO:0005886	cellular_component	plasma membrane (30, 2.01)	4.69	2.03313e-05	0.00815286	5752	KLRB1,AQP9,TACSTD2,FCAR,S100A12,PI3,KLRC1,ENPP5,HLA-DQA1,PTGDR,P2RY12,MGAM,CR1,KLRC2,TRDV3,ACSL1,ANXA3,KCNJ15,KREMEN1,GZMB,MCEMP1,NRG1,SYTL2,TGFBR3,VNN1,KLRF1,KLRD1,FOLR3,DSC2
GO:0070820	cellular_component	tertiary granule (6, 14.13)	5.31	4.9487e-06	0.00496107	164	MGAM,CR1,MCEMP1,FOLR3,MMP9,FCAR
GO:0042581	cellular_component	specific granule (6, 14.48)	5.37	4.31444e-06	0.00865046	160	SLPI,ARG1,ANXA3,MCEMP1,FOLR3,FCAR
GO:0023024	molecular_function	MHC class I protein complex binding (3, 193.06)	5.87	1.35361e-06	0.00638631	6	KLRC2,KLRD1,KLRC1
GO:0071799	biological_process	cellular response to prostaglandin D stimulus (2, 154.45)	3.87	0.000136397	0.0504829	5	AKR1C3,PTGDR
GO:0007166	biological_process	cell surface receptor signaling pathway (17, 2.65)	3.93	0.000117035	0.0454297	2480	P2RY12,CR1,KLRB1,ACSL1,KREMEN1,NRG1,MMP9,FCAR,TGFBR3,SOCS3,PDK4,KLRF1,KLRD1,KLRC1,PF4V1,HLA-DQA1
GO:0002228	biological_process	natural killer cell mediated immunity (3, 46.34)	4.29	5.09873e-05	0.0208067	25	KLRC2,GZMB,KLRD1
GO:0019730	biological_process	antimicrobial humoral response (5, 13.60)	4.41	3.84822e-05	0.0165525	142	SLPI,S100A12,ADM,PI3,PF4V1
GO:0050776	biological_process	regulation of immune response (12, 4.49)	4.96	1.09607e-05	0.00513057	1031	SOCS3,GBP5,CR1,KLRB1,ARG1,KLRF1,SH2D1B,KLRD1,KLRC1,FCAR,HLA-DQA1
GO:0043312	biological_process	neutrophil degranulation (11, 8.81)	7.37	4.30277e-08	6.22532e-05	482	MGAM,CR1,VNN1,SLPI,ARG1,ANXA3,S100A12,MCEMP1,FOLR3,MMP9,FCAR
